# Supplementary material for: Highly luminescent MAPbI3 perovskite quantum dots with a simple purification process via ultrasound-assisted bead milling
Source: Royal Society of Chemistry journal article supplement (doi:10.1039/d1ra08887d), 2022-01-01
Supplement: d1ra08887d1.pdf [file d1ra08887d1.pdf]

Supplementary information

**Highly Luminescent MAPbI<sub>3</sub> Perovskite Quantum Dot with Simple Purification Process via Ultrasound-assisted Bead Milling**

Junya Enomoto<sup>a</sup>, Ryota Sato<sup>a</sup>, Masaaki Yokoyama<sup>a</sup>, Taisei Kimura<sup>a</sup>, Naoaki Oshita<sup>a</sup>, Kazuki Umemoto<sup>a</sup>, Satoshi Asakura<sup>b</sup> and Akito Masuhara<sup>\*a, c</sup>

---

<sup>a</sup> *Graduate School of Science and Engineering, Yamagata University, 4-3-16, Yonezawa, Yamagata 992-8510, Japan.*

<sup>b</sup> *ISE Chemicals Corporation, 1-3-1, Kyobashi, Chuo-ku, Tokyo, Japan.*

<sup>c</sup> *Frontier Center for Organic Materials (FROM), Yamagata University, 4-3-16, Jonan, Yonezawa, Yamagata, 992-8510, Japan.*

---

\*E-mail: masuhara@yz.yamagata-u.ac.jp

Phone: +81 238 26 3891; Fax +81 238 26 3891 (A.M.).

ORCID: 0000-0001-7108-959X

## 1. Supporting Results

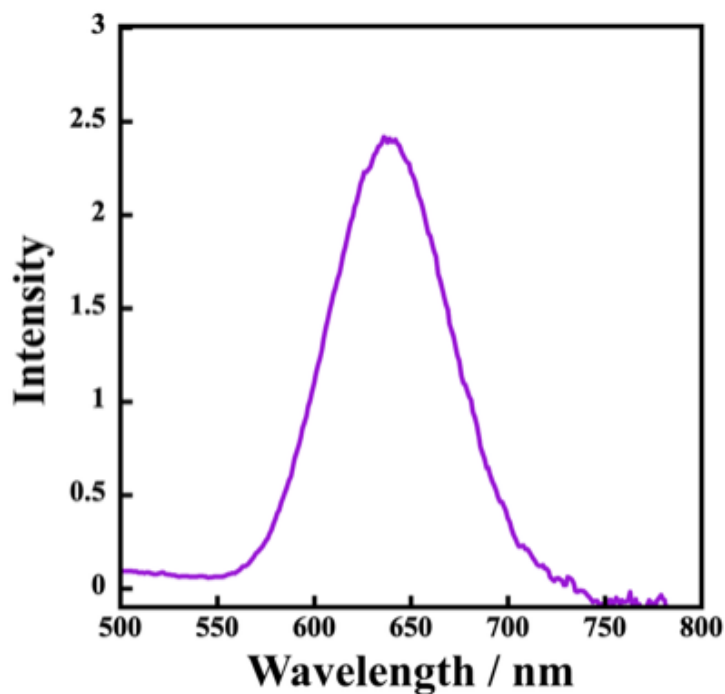

Fig. ES1 PL spectrum of Pbl<sub>2</sub> nanocrystals prepared using ultrasound-assisted bead milling.

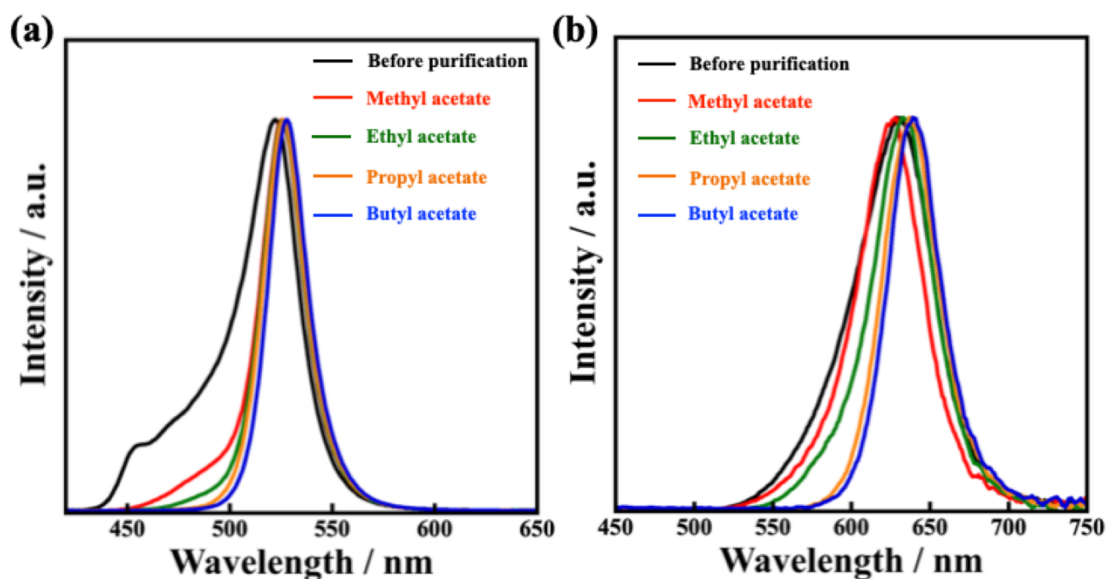

Fig. ES2 PL spectra of (a) MAPbBr<sub>3</sub> and (b) MAPb(Br/I)<sub>3</sub> QDs before purification and purified by methyl, ethyl, propyl, and butyl acetate.

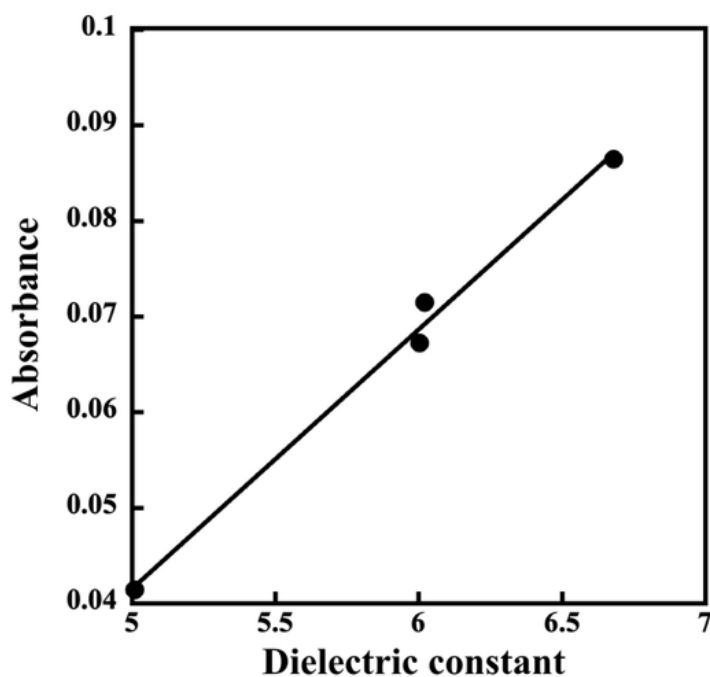

Fig. ES3 The relationship between absorbance at wavelength of 720 nm and dielectric constant of purifying solvents.

Table ES1 Summary of the properties including a maximum PL peak ( $\lambda_{PL}$ ), FWHM, PLQY, average PL lifetime ( $\tau_{Ave}$ ), the average particle size (D) calculated from TEM. Comparison with MAPbI<sub>3</sub> QDs before purification, and purified by methyl, ethyl, propyl, butyl acetate, respectively.

| <b>Sample</b>              | <b><math>\lambda_{PL}</math><br/>/ nm</b> | <b>FWHM<br/>/ nm</b> | <b>PLQY<br/>/ %</b> | <b><math>\tau_{Ave}</math><br/>/ ns</b> | <b>D<br/>/ nm</b> |
|----------------------------|-------------------------------------------|----------------------|---------------------|-----------------------------------------|-------------------|
| <b>Before purification</b> | <b>739</b>                                | <b>60</b>            | <b>57</b>           | <b>32.0</b>                             | <b>7.2</b>        |
| <b>Methyl acetate</b>      | <b>741</b>                                | <b>48</b>            | <b>63</b>           | <b>46.3</b>                             | <b>11.3</b>       |
| <b>Ethyl acetate</b>       | <b>742</b>                                | <b>47</b>            | <b>60</b>           | <b>41.8</b>                             | <b>11.1</b>       |
| <b>Propyl acetate</b>      | <b>745</b>                                | <b>44</b>            | <b>62</b>           | <b>45.6</b>                             | <b>11.0</b>       |
| <b>Butyl acetate</b>       | <b>747</b>                                | <b>44</b>            | <b>61</b>           | <b>46.1</b>                             | <b>11.2</b>       |

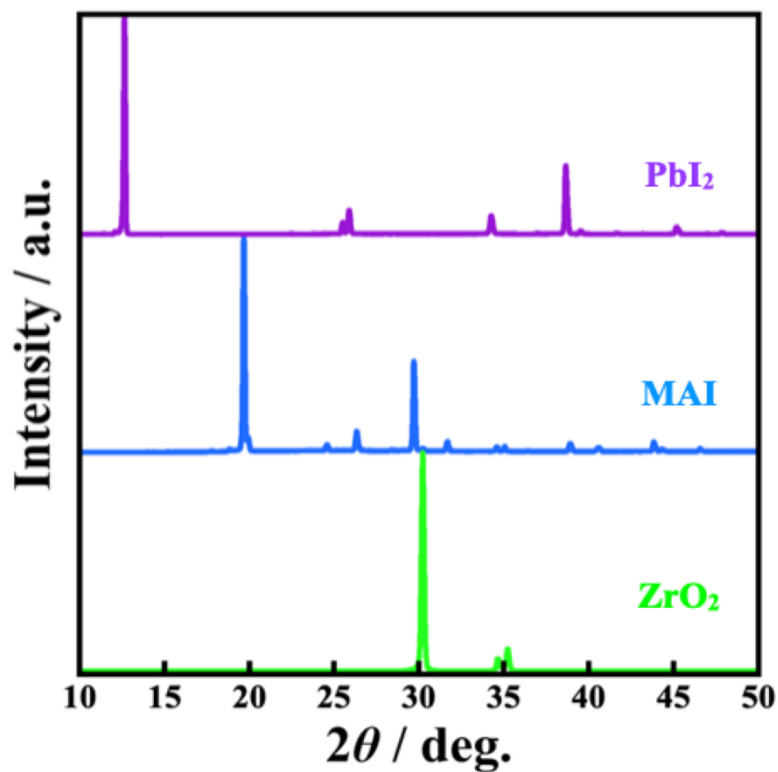

Fig. ES4 XRD patterns of PbI<sub>2</sub>, MAI, and ZrO<sub>2</sub> beads.

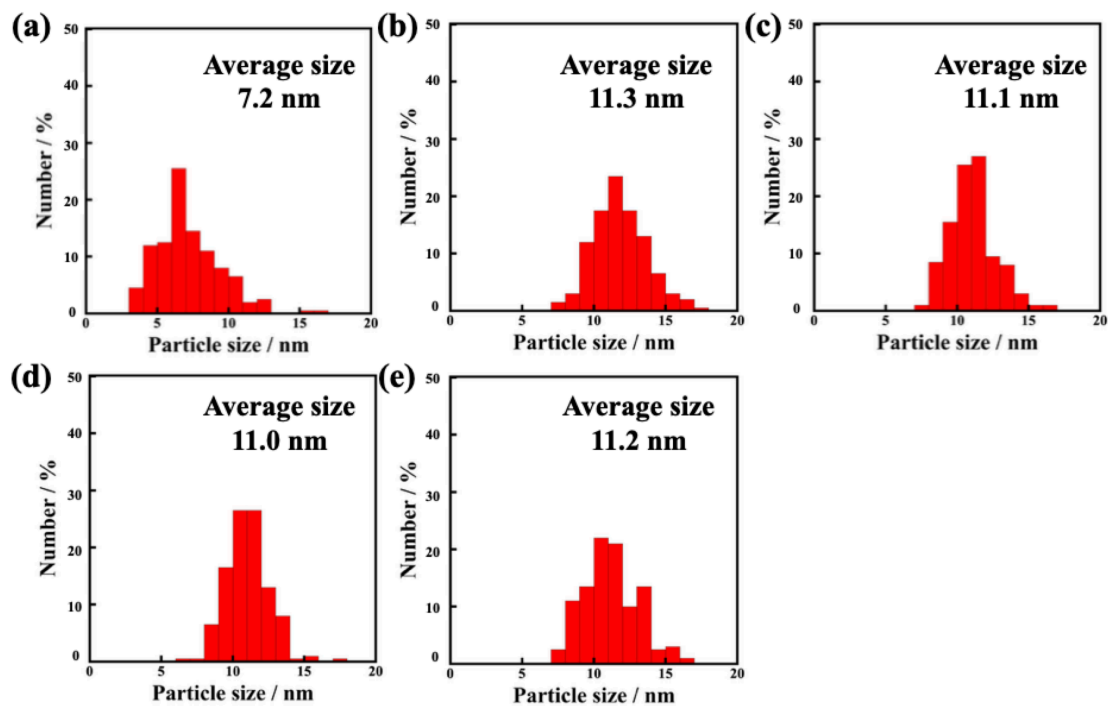

Fig. ES5 The size distribution of MAPbI<sub>3</sub> QDs (a) before purification, and purified by (b) methyl acetate, (c) ethyl acetate, (d) propyl acetate, (e) butyl acetate, respectively. Average size of MAPbI<sub>3</sub> QDs was determined by counting more than 200 QDs from TEM images.

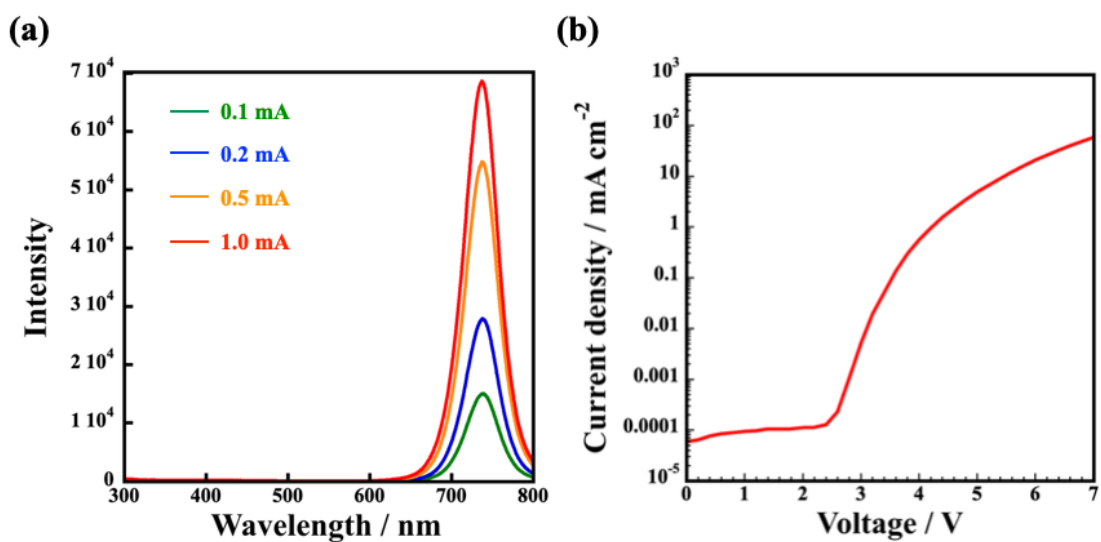

Fig. ES6 (a) EL spectra over electric current and (b) current density-voltage characteristics of the LED containing MAPbI<sub>3</sub> QDs purified by methyl acetate.
